# Supplementary material
Source: PubMed Central journal article supplement (PMC3416613)
Supplement: AEM.01199-12_zam999103609so1.pdf [file AEM.01199-12_zam999103609so1.pdf]

Supplementary TABLE 1. Primers used to determine partial or full-length nucleotide sequence of *cqm1*<sub>REC-D25</sub> allele from *Culex quinquefasciatus* *cqm1* gene (GenBank accession number DQ333335).

| Primer | Sequence (5'-3')            | Nucleotide position in the genomic sequence |
|--------|-----------------------------|---------------------------------------------|
| F      | CGAGAATTCTCTCCGAGCAAGATGCGA | 5' UTR                                      |
| F2     | CGAACGCTGGGTGCTTTGGGCCTAGTC | 4-30                                        |
| F3     | TCTGTTGGCGACGACCGTCAACGGG   | 33-57                                       |
| F4     | AGGGGGTGGTCCGCCGAATAAT      | 471-492                                     |
| R      | GCACTGCAGATTACGCCTGTATCAGCC | 3' UTR                                      |
| R1     | GCCATGCACGTGACCGTAATTTATGA  | 1849-1874                                   |
| R3     | GCCATAATCGCTAGCAGCAATCCAATC | 1803-1829                                   |
| R4     | GCACTGCAGGGAAGTGGTGAAGGTAC  | 1405-1431                                   |
