# Supplementary material
Source: PubMed Central journal article supplement (PMC3416613)
Supplement: AEM.01199-12_zam999103609so2.pdf [file AEM.01199-12_zam999103609so2.pdf]

1  
2  
3  
4  
5

Supplementary TABLE 2. Polymorphisms found on the full-length nucleotide sequence of the *cqm1*<sub>REC-D16</sub> allele from the *Culex quinquefasciatus* *cqm1* gene (GenBank accession number DQ333335). Diverging nucleotides which cause amino acids changes in deduced sequence coded by *cqm1* (Romão et al., FEBS J. 273:1556-1568) are marked (\*).

| Nucleotide position | <i>cqm1</i> | <i>cqm1</i> <sub>REC-D16</sub> | Nucleotide position | <i>cqm1</i> | <i>cqm1</i> <sub>REC-D16</sub> |
|---------------------|-------------|--------------------------------|---------------------|-------------|--------------------------------|
| 7                   | C           | A*                             | 736                 | T           | C*                             |
| 15                  | A           | T                              | 1084                | G           | A                              |
| 22                  | A           | G*                             | 1140                | C           | T                              |
| 25                  | C           | T                              | 1262                | C           | T                              |
| 44                  | T           | C*                             | 1271                | A           | G                              |
| 120                 | T           | C                              | 1325                | T           | C                              |
| 123                 | G           | A                              | 1328                | C           | A                              |
| 156                 | T           | A                              | 1340                | C           | A                              |
| 249                 | G           | C                              | 1349                | A           | C                              |
| 252                 | A           | G                              | 1367                | T           | C                              |
| 264                 | T           | C                              | 1391                | G           | A                              |
| 284                 | C           | A*                             | 1439                | T           | G                              |
| 288                 | C           | T                              | 1505                | A           | T                              |
| 321                 | C           | T                              | 1506                | T           | C                              |
| 337                 | T           | G*                             | 1559                | C           | T                              |
| 357                 | G           | A                              | 1577                | G           | A                              |
| 369                 | T           | C                              | 1619                | C           | T                              |

|     |   |    |      |   |   |
|-----|---|----|------|---|---|
| 393 | C | T  | 1749 | C | T |
| 422 | C | T  | 1772 | C | T |
| 438 | C | T  | 1776 | T | A |
| 462 | C | T  | 1839 | T | C |
| 611 | C | T* | —    | — | — |

6

7
